# Supplementary material for: Assessing the perfluoroalkyl acid-induced swelling of Förster resonance energy transfer-capable poly(N-isopropylacrylamide) microgels
Source: Royal Society of Chemistry journal article supplement (doi:10.1039/d1sm00985k), 2021-01-01
Supplement: d1sm00985k1.pdf [file d1sm00985k1.pdf]

## Assessing the Perfluoroalkyl Acid-Induced Swelling of Förster Resonance Energy Transfer-Capable Poly(*N*-Isopropylacrylamide) Microgels

Dustin T. Savage,<sup>1</sup> J. Zach Hilt<sup>1</sup> and Thomas D. Dziubla<sup>1</sup>

<sup>1</sup> University of Kentucky, College of Engineering, 512 Administration Drive, 177 F. Paul Anderson Tower, Lexington, KY 40506

Correspondence to: Thomas D. Dziubla (E-mail: thomas.dziubla@uky.edu)

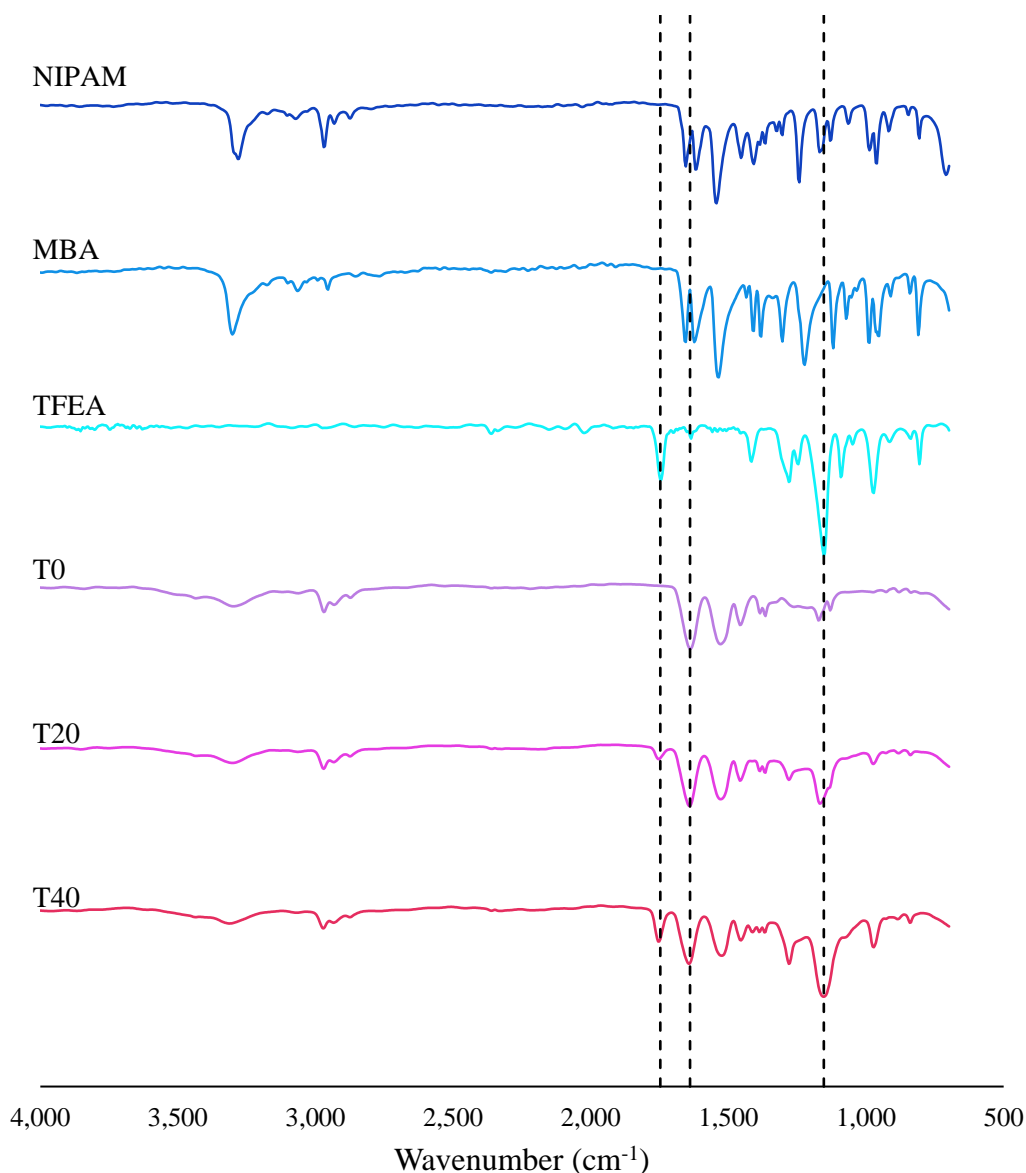

Supplementary Figure 1: Fourier-transform infrared spectra for the monomers and resulting microgels synthesized. Dashed lines are guides representing 1,748  $\text{cm}^{-1}$  (carbonyl), 1,639  $\text{cm}^{-1}$  (amide I), and 1,153  $\text{cm}^{-1}$  ( $\text{CF}_x$ ) from left to right.

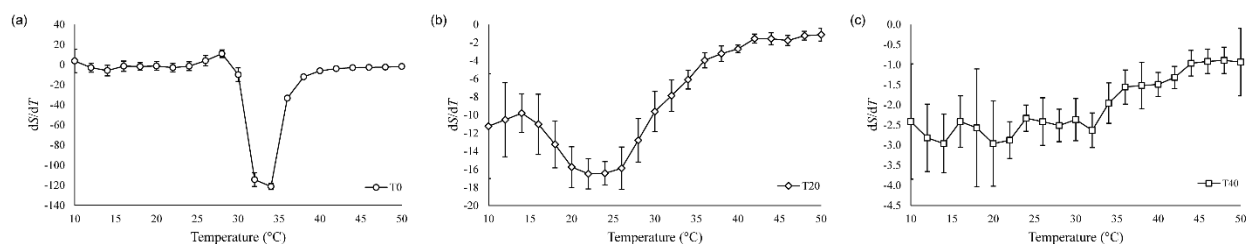

Supplementary Figure 2: Derivative of the z-average diameter with respect to temperature for (a) T0, (b) T20, and (c) T40 microgels. Minima roughly indicate the position of the respective lower critical solution temperature for each microgel. Values were calculate using finite difference.

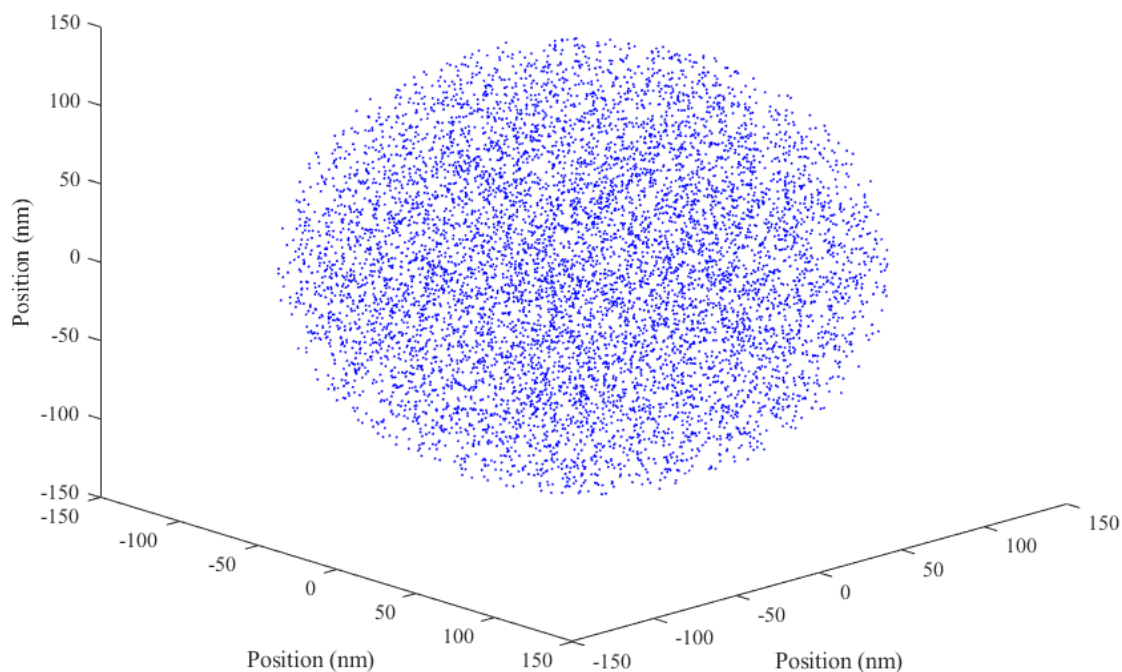

Supplementary Figure 3: An example model of dye locations within a collapsed microgel holding a z-average diameter of 270.9 nm. The sphere shown contains a simulated 0.01 mol% theoretical load of AEMA. Each dye is randomly drawn; successive iterations of the same simulation will result in slightly different dye locations relative to this image.

Dye positions were simulated with:

$$r_n = \frac{r_1 U^{1/3}}{\sqrt{x_n^2 + y_n^2 + z_n^2}}$$

$$x = x_n r_n$$

$$y = y_n r_n$$

$$z = z_n r_n$$

Where  $x_n$ ,  $y_n$ , and  $z_n$  are normally distributed random variables,  $U$  is a uniformly distributed random variable,  $r_1$  is the collapsed nanoparticle radius, and  $x$ ,  $y$ , and  $z$  are the cartesian coordinates for the  $n$ th dye. The number of dyes for a given microgel collapsed volume ( $p$ ) was estimated via:

$$p = \frac{fV_1}{V_m}$$

Using  $f$  as the anchor loading fraction,  $V_1$  as the collapsed microgel volume, and  $V_m$  as the average monomer volume ( $126.9 \text{ \AA}^3$ ). When simulating the swollen state, a sham dye population was inserted with:

$$f_{sham} = \frac{pV_m}{V_2}$$

Where  $V_2$  is the volume of the swollen microgel.

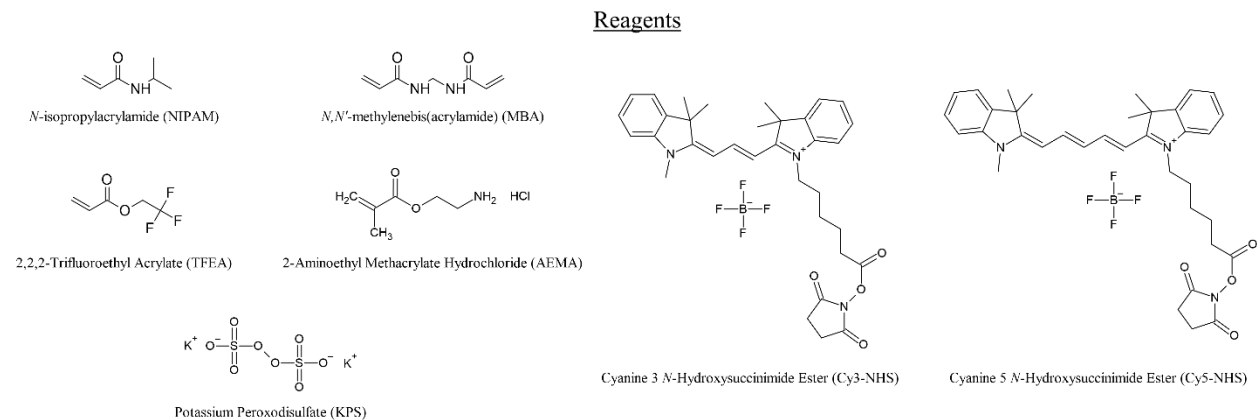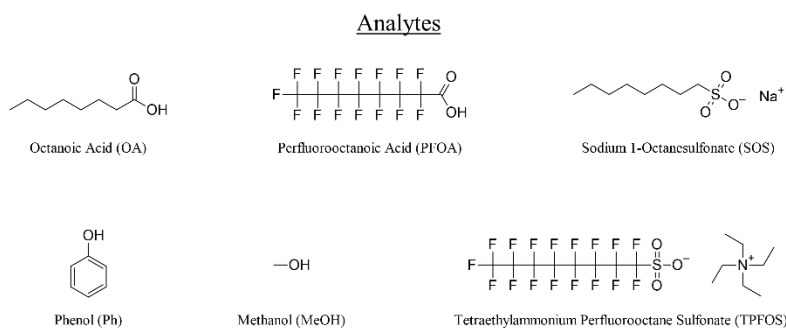

Supplementary Figure 4: Chemical structures of synthesis reagents and analytes tested throughout the study.

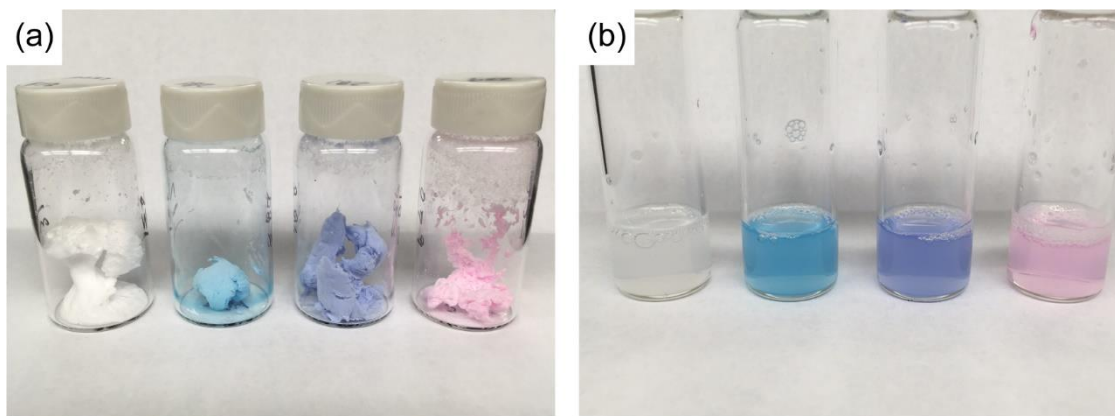

Supplementary Figure 5: Pictures of microgels that are (a) dry and (b) dispersed in water at 2 mg mL<sup>-1</sup>. From left to right: T0 microgels, microgels dyed with Cy5, Cy3 and Cy5, and Cy3.

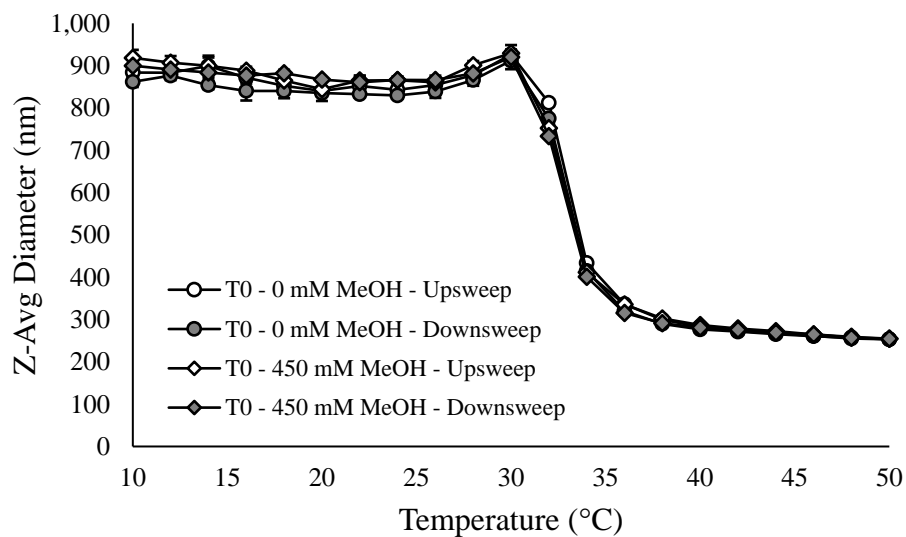

Supplementary Figure 6: Temperature response of T0 microgels in water alone (circles) and exposed to 450 mM methanol (diamonds). Upsweeps progressing from 10 °C to 50 °C are colored white, and downsweeps from 50 °C to 10 °C are gray.
